# Supplementary material for: Transcriptome Analysis of Diurnal and Nocturnal-Warmed Plants, the Molecular Mechanism Underlying Cold Deacclimation Response in Deschampsia antarctica
Source: MDPI journal article supplement (doi:10.3390/ijms241311211), 2023-07-07
Supplement: s1 [file s1]

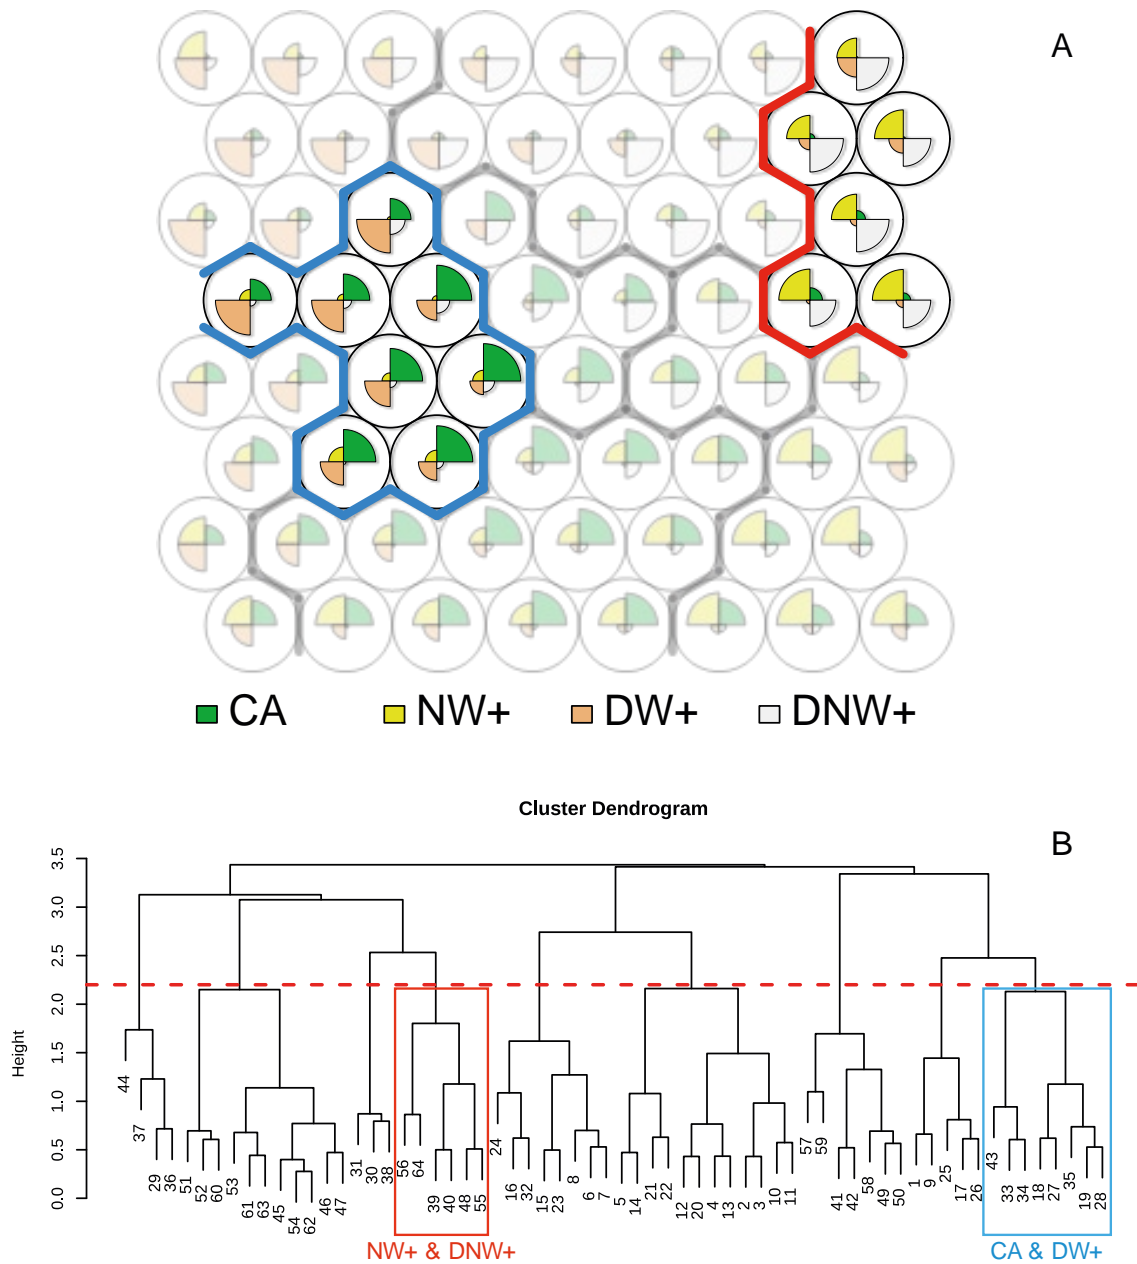

**Figure S1.** Super-nodes clustering. Visual representation of gene co-expression in the 64 original nodes and their clustering in the 8 super-nodes (A). Clustering dendrogram of the 64 original nodes, demarcating the cut line at height 2.2 with a red dashed line (B). The super-node grouping up-regulated genes by nocturnal warming is outlined in red, meanwhile the super-node grouping down-regulated genes are outlined in blue. The treatments were: 8°C/0°C, plants cold acclimated (CA); 8°C/6°C, nocturnal warming (NW+); 14°C/0°C, diurnal warming (DW+) and 14°C/6°C, diurnal-nocturnal warming (DNW+). The plants were cultivated in chambers under controlled conditions at a photoperiod and thermoperiod of 18h/6h duration.

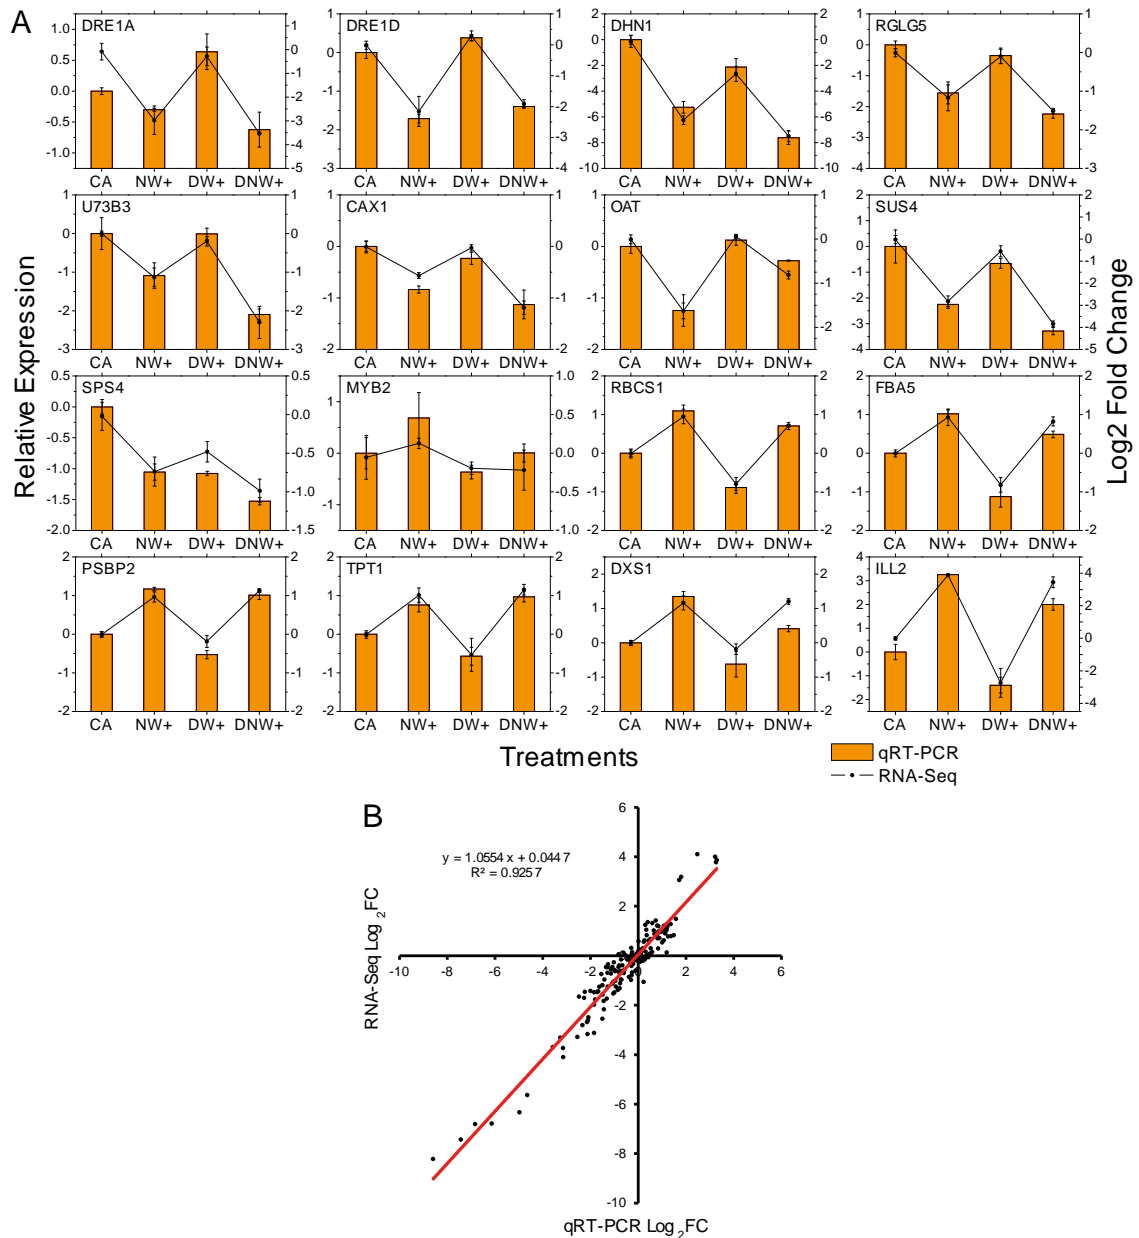

**Figure S2.** Transcriptome validation. Relation between the Log<sub>2</sub> Fold change (FC) of gene expression evaluated by real-time PCR (qRT-PCR) and Log<sub>2</sub> FC of FPKM (A). Bars and circles show the mean  $\pm$  standard error ( $n = 3$ ) for qRT-PCR and RNA-seq respectively, corresponding to experimental treatments with the following day/night thermoperiod: 8°C/0°C cold-acclimated (CA); 8°C/6°C nocturnal warming (NW+); 14°C/0°C diurnal warming (DW+) and 14°C/6°C diurnal and nocturnal warming (DNW+), with 18h/6h photoperiod and thermoperiods duration. Significant Pearson correlation ( $p < 0.05$ ) between qRT-PCR and RNA-seq of 16 differentially expressed genes (B).
